# Supplementary material
Source: PubMed Central journal article supplement (PMC151323)
Supplement: pnas_0336132100_4.pdf [file pnas_0336132100_4.pdf]

Table 1. Specific progestin binding obtained in double-antibody receptor capture assays. Results represented as means  $\pm$  SE of three separate assays.

| Antibodies | Specific binding dpm |
|------------|----------------------|
| PR10-1     | 264.3 $\pm$ 18.3     |
| PR53-4     | 78.5 $\pm$ 17.9      |
| PR64-4     | 39.9 $\pm$ 12.4      |
| PR18-1     | 10.4 $\pm$ 3.8       |
| PR60-1     | 0                    |
| PR66-2     | 0                    |
| PR73-6     | 0                    |
| PR11-3     | 0                    |
