# Supplementary material
Source: PubMed Central journal article supplement (PMC151323)

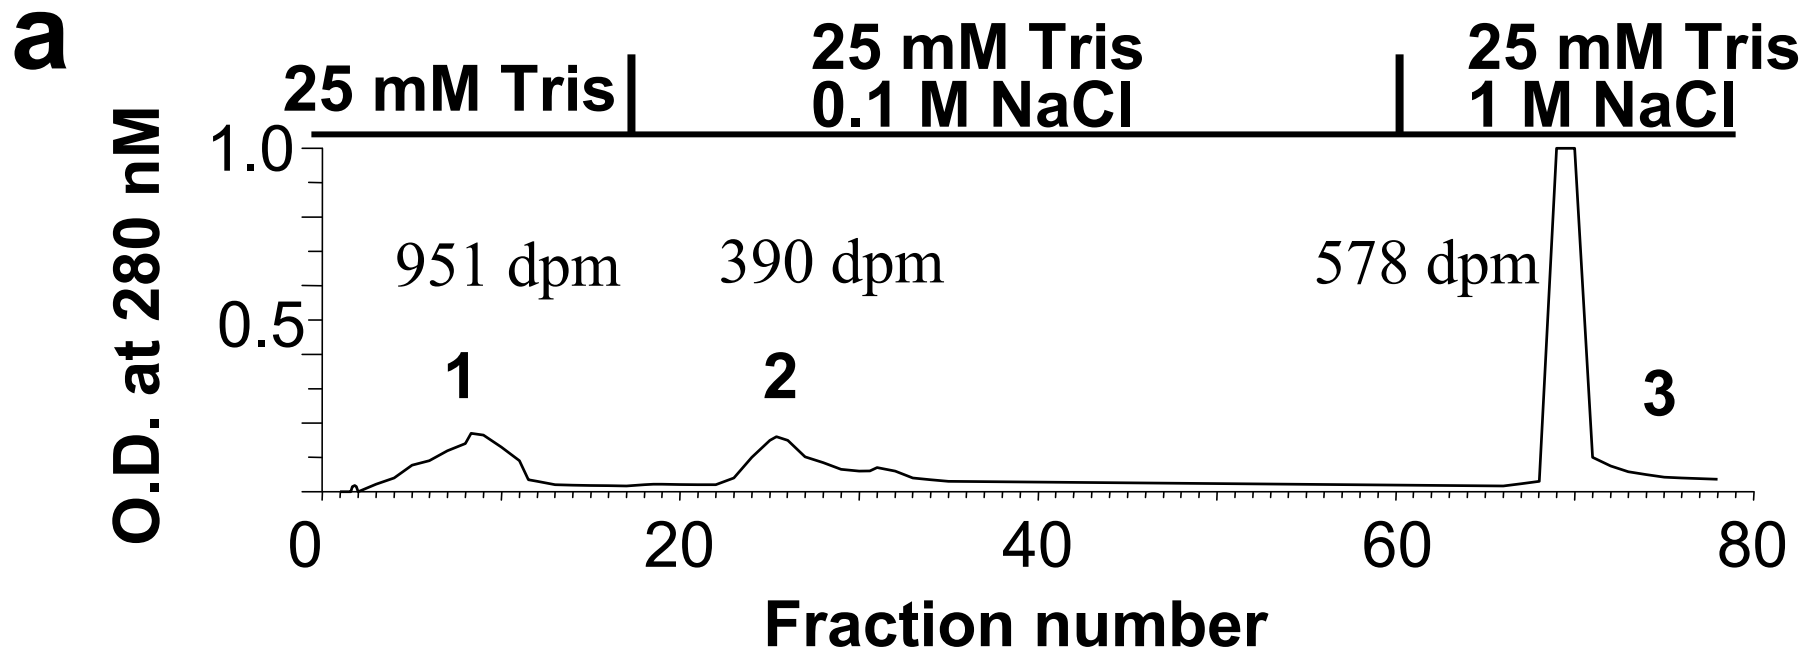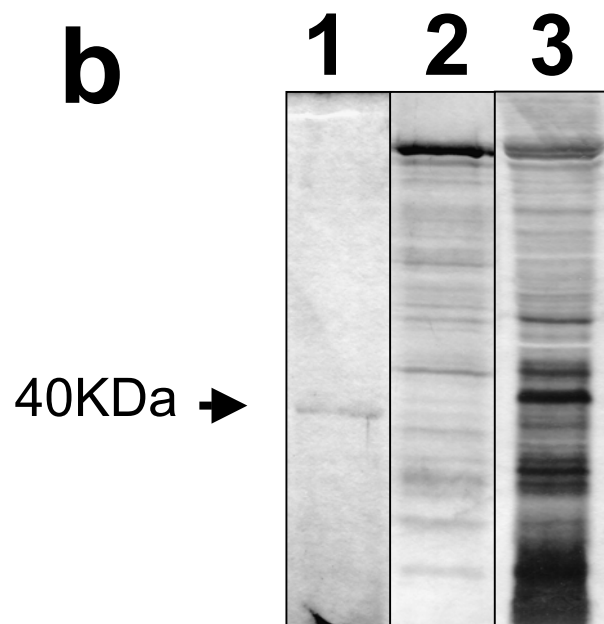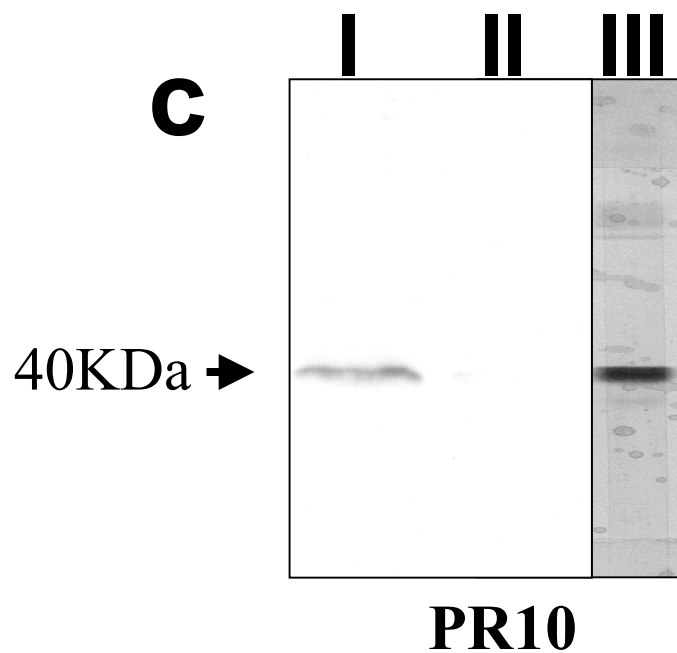

Supplement: pnas_0336132100_3.pdf [file pnas_0336132100_3.pdf]
